# Supplementary material for: Triplet energy vs. electron transfers in porphyrin- and tetrabenzoporphyrin-carboxylates/Pd3(dppm)3(CO)2+ cluster assemblies; a question of negative charge
Source: Royal Society of Chemistry journal article supplement (doi:10.1039/c7nj03943c), 2017-12-08
Supplement: c7nj03943c1.pdf [file c7nj03943c1.pdf]

## Supporting Information

### Triplet Energy vs Electron Transfers in Porphyrin- and Tetrabenzoporphyrin-carboxylates/ $\text{Pd}_3(\text{dppm})_3(\text{CO})^{2+}$ Cluster Assemblies; A Question of Negative Charge

Peng Luo,<sup>a</sup> Paul-Ludovic Karsenti,<sup>a</sup> Benoit Marsan<sup>b\*</sup> and Pierre D. Harvey<sup>a\*</sup>

<sup>a</sup>Département de chimie, Université de Sherbrooke, Sherbrooke, QC, J1K 2R1, Canada.

<sup>b</sup>Département de chimie, Université du Québec à Montréal, Montréal, QC, H2X 2J6, Canada.

#### Table of Content

|                                                                                                                                                                                                                                                                                                                                                                                                                                                                                                                                                                                                                                                                                                                                                                                                                                                                                                                                                                                                        |    |
|--------------------------------------------------------------------------------------------------------------------------------------------------------------------------------------------------------------------------------------------------------------------------------------------------------------------------------------------------------------------------------------------------------------------------------------------------------------------------------------------------------------------------------------------------------------------------------------------------------------------------------------------------------------------------------------------------------------------------------------------------------------------------------------------------------------------------------------------------------------------------------------------------------------------------------------------------------------------------------------------------------|----|
| <b>Table S1.</b> Phosphorescence lifetimes for <b>TCPP</b> and <b>TCBPB</b> in 1:1 MeOH:2MeTHF mixture with increasing amount of $[\text{Pd}_3^{2+}]$ at 77 K.                                                                                                                                                                                                                                                                                                                                                                                                                                                                                                                                                                                                                                                                                                                                                                                                                                         | S2 |
| <b>Figure S1.</b> Top left: variation of phosphorescence spectra of <b>TCPP</b> ( $1.02 \times 10^{-5}$ M) upon adding $[\text{Pd}_3^{2+}]$ in 1:1 MeOH:2MeTHF at 77 K. Curves A-J were obtained with successive addition of $[\text{Pd}_3^{2+}]$ . Each curve represents an increase in $[\text{Pd}_3^{2+}]$ concentration by $3.65 \times 10^{-6}$ for <b>TCPP</b> . Top right: relative decrease of intensity with respect to the starting intensity. Middle left: plot of $(\Phi_P^\circ/\Phi_P)$ vs $[\text{Pd}_3^{2+}]$ ( <i>i.e.</i> Stern-Volmer plot). Middle right: graph of $\log[(\Phi_P^\circ - \Phi_P)/\Phi_P]$ vs $\log[\text{Pd}_3^{2+}]$ . Bottom left: graph of $[1 - (\Phi_P/\Phi_P^\circ)]/[\text{Pd}_3^{2+}]$ vs $(\Phi_P/\Phi_P^\circ)$ . Bottom right: graph of $\ln(W)$ vs $[\text{Pd}_3^{2+}]$ for <b>TCPP</b> ••• $[\text{Pd}_3^{2+}]_x$ assembly in 1:1 MeOH:2MeTHF at 77 K.                                                                                                | S3 |
| <b>Figure S2.</b> Top left: variation of phosphorescence spectra of <b>TCPEP</b> ( $5.50 \times 10^{-6}$ M) upon adding $[\text{Pd}_3^{2+}]$ in 1:1 MeOH:2MeTHF at 77 K. Curves A-J were obtained with successive addition of $[\text{Pd}_3^{2+}]$ . Each curve represents an increase in $[\text{Pd}_3^{2+}]$ concentration by $2.11 \times 10^{-6}$ for <b>TCPEP</b> . Top right: relative decrease of intensity with respect to the starting intensity. Middle left: plot of $(\Phi_P^\circ/\Phi_P)$ vs $[\text{Pd}_3^{2+}]$ ( <i>i.e.</i> Stern-Volmer plot). Middle right: graph of $\log[(\Phi_P^\circ - \Phi_P)/\Phi_P]$ vs $\log[\text{Pd}_3^{2+}]$ . Bottom left: graph of $[1 - (\Phi_P/\Phi_P^\circ)]/[\text{Pd}_3^{2+}]$ vs $(\Phi_P/\Phi_P^\circ)$ . Bottom right: graph of $\ln(W)$ vs $[\text{Pd}_3^{2+}]$ for <b>TCPEP</b> ••• $[\text{Pd}_3^{2+}]_x$ assembly in 1:1 MeOH:2MeTHF at 77 K.                                                                                             | S4 |
| <b>Figure S3.</b> Top left: variation of phosphorescence spectra of <b>TCPEBP</b> ( $7.78 \times 10^{-6}$ M) upon adding $[\text{Pd}_3^{2+}]$ in 1:1 MeOH:2MeTHF at 77 K. Note that the phosphorescence peaks do not move upon changing the excitation wavelength. Curves A-J were obtained with successive addition of $[\text{Pd}_3^{2+}]$ . Each curve represents an increase in $[\text{Pd}_3^{2+}]$ concentration by $5.67 \times 10^{-5}$ for <b>TCPEBP</b> . Top right: relative decrease of intensity with respect to the starting intensity. Middle left: plot of $(\Phi_P^\circ/\Phi_P)$ vs $[\text{Pd}_3^{2+}]$ ( <i>i.e.</i> Stern-Volmer plot). Middle right: graph of $\log[(\Phi_P^\circ - \Phi_P)/\Phi_P]$ vs $\log[\text{Pd}_3^{2+}]$ . Bottom left: graph of $[1 - (\Phi_P/\Phi_P^\circ)]/[\text{Pd}_3^{2+}]$ vs $(\Phi_P/\Phi_P^\circ)$ . Bottom right: graph of $\ln(W)$ vs $[\text{Pd}_3^{2+}]$ for <b>TCPEBP</b> ••• $[\text{Pd}_3^{2+}]_x$ assembly in 1:1 MeOH:2MeTHF at 77 K. | S5 |
| <b>Figure S4.</b> Optimized triplet geometry of <b>TCPP</b> (as $\text{Na}^+$ salt) in a MeOH solvent field.                                                                                                                                                                                                                                                                                                                                                                                                                                                                                                                                                                                                                                                                                                                                                                                                                                                                                           | S6 |
| <b>Figure S5.</b> Representations of the semi-occupied frontier MOs of <b>TCPP</b> ( $\text{Na}^+$ salt).                                                                                                                                                                                                                                                                                                                                                                                                                                                                                                                                                                                                                                                                                                                                                                                                                                                                                              | S6 |
| <b>Table S2.</b> Evaluation of the ( $S_0$ - $T_1$ ) energy gap for <b>TCPP</b> .                                                                                                                                                                                                                                                                                                                                                                                                                                                                                                                                                                                                                                                                                                                                                                                                                                                                                                                      | S6 |
| <b>Figure S6.</b> Optimized triplet geometry of <b>TCBPB</b> ( $\text{Na}^+$ salt) in MeOH solvent field.                                                                                                                                                                                                                                                                                                                                                                                                                                                                                                                                                                                                                                                                                                                                                                                                                                                                                              | S6 |
| <b>Figure S7.</b> Representations of the semi-occupied frontier MOs of <b>TCBPB</b> ( $\text{Na}^+$ salt).                                                                                                                                                                                                                                                                                                                                                                                                                                                                                                                                                                                                                                                                                                                                                                                                                                                                                             | S7 |
| <b>Table S3.</b> Evaluation of the ( $S_0$ - $T_1$ ) energy gap for <b>TCBPB</b> .                                                                                                                                                                                                                                                                                                                                                                                                                                                                                                                                                                                                                                                                                                                                                                                                                                                                                                                     | S7 |
| <b>Figure S8.</b> Optimized triplet geometry of <b>TCPEP</b> ( $\text{Na}^+$ salt) in MeOH solvent field.                                                                                                                                                                                                                                                                                                                                                                                                                                                                                                                                                                                                                                                                                                                                                                                                                                                                                              | S7 |

|                                                                                                                                                                                                |     |
|------------------------------------------------------------------------------------------------------------------------------------------------------------------------------------------------|-----|
| <b>Figure S9.</b> Representations of the semi-occupied frontier MOs of <b>TCPEP</b> (as Na <sup>+</sup> salt).                                                                                 | S7  |
| <b>Table S4.</b> Evaluation of the (S <sub>0</sub> -T <sub>1</sub> ) energy gap for <b>TCPEP</b> in a MeOH solvent field.                                                                      | S8  |
| <b>Figure S10.</b> Optimized triplet geometry of <b>TCPEBP</b> (as Na <sup>+</sup> salt) in a MeOH solvent field.                                                                              | S8  |
| <b>Figure S11.</b> Representations of the semi-occupied frontier MOs of <b>TCPEBP</b> (as Na <sup>+</sup> salt).                                                                               | S8  |
| <b>Table S5.</b> Evaluation of the (S <sub>0</sub> -T <sub>1</sub> ) energy gap for <b>TCPEBP</b> .                                                                                            | S8  |
| <b>Figure S12.</b> Optimized triplet geometry of the <b>TCPP•••[Pd<sub>3</sub><sup>2+</sup>]</b> assembly in a MeOH solvent field.                                                             | S8  |
| <b>Figure S13.</b> Representations of the semi-occupied frontier MOs of the <b>TCPP•••[Pd<sub>3</sub><sup>2+</sup>]</b> assembly.                                                              | S9  |
| <b>Table S6.</b> Comparison of selected calculated distances in the <b>TCPP•••[Pd<sub>3</sub><sup>2+</sup>]</b> assembly.                                                                      | S9  |
| <b>Figure S14.</b> Representations of the semi-occupied frontier MOs of the <b>TCPBP•••[Pd<sub>3</sub><sup>2+</sup>]</b> assembly.                                                             | S9  |
| <b>Table S7.</b> Comparison of selected calculated distances in the <b>TCPBP•••[Pd<sub>3</sub><sup>2+</sup>]</b> assembly.                                                                     | S10 |
| <b>Figure S15.</b> Optimized triplet geometry of the <b>TCPEP•••[Pd<sub>3</sub><sup>2+</sup>]</b> assembly in MeOH solvent field.                                                              | S10 |
| <b>Figure S16.</b> Representations of the semi-occupied frontier MOs of the <b>TCPEP•••[Pd<sub>3</sub><sup>2+</sup>]</b> assembly.                                                             | S10 |
| <b>Table S8.</b> Comparison of selected calculated distances in the <b>TCPEP•••[Pd<sub>3</sub><sup>2+</sup>]</b> assembly.                                                                     | S10 |
| <b>Table S9.</b> Comparison of selected calculated distances in the <b>TCPEBP•••[Pd<sub>3</sub><sup>2+</sup>]</b> assembly.                                                                    | S11 |
| <b>Figure S17.</b> Monitoring of the transient signals of <b>TCPP</b> , <b>TCPEP</b> and <b>PCPEBP</b> in 2MeTHF in the presence of 2 equiv. of <b>[Pd<sub>3</sub><sup>2+</sup>]</b> at 298 K. | S11 |

**Table S1.** Phosphorescence lifetimes for **TCPP** and **TCPBP** in 1:1 MeOH:2MeTHF mixture with increasing amount of **[Pd<sub>3</sub><sup>2+</sup>]** at 77 K.

| Porphyrins vs <b>[Pd<sub>3</sub><sup>2+</sup>]</b> | <b>TCPP</b> (ms) | <b>TCPBP</b> (ms) |
|----------------------------------------------------|------------------|-------------------|
| 1:0                                                | 25.18±0.47       | 24.20±0.44        |
| 1:0.25                                             | 25.14±0.42       | 24.17±0.49        |
| 1:0.5                                              | 25.10±0.37       | 24.12±0.48        |
| 1:0.75                                             | 25.06±0.38       | 24.07±0.55        |
| 1:1                                                | 25.01±0.44       | 24.03±0.50        |

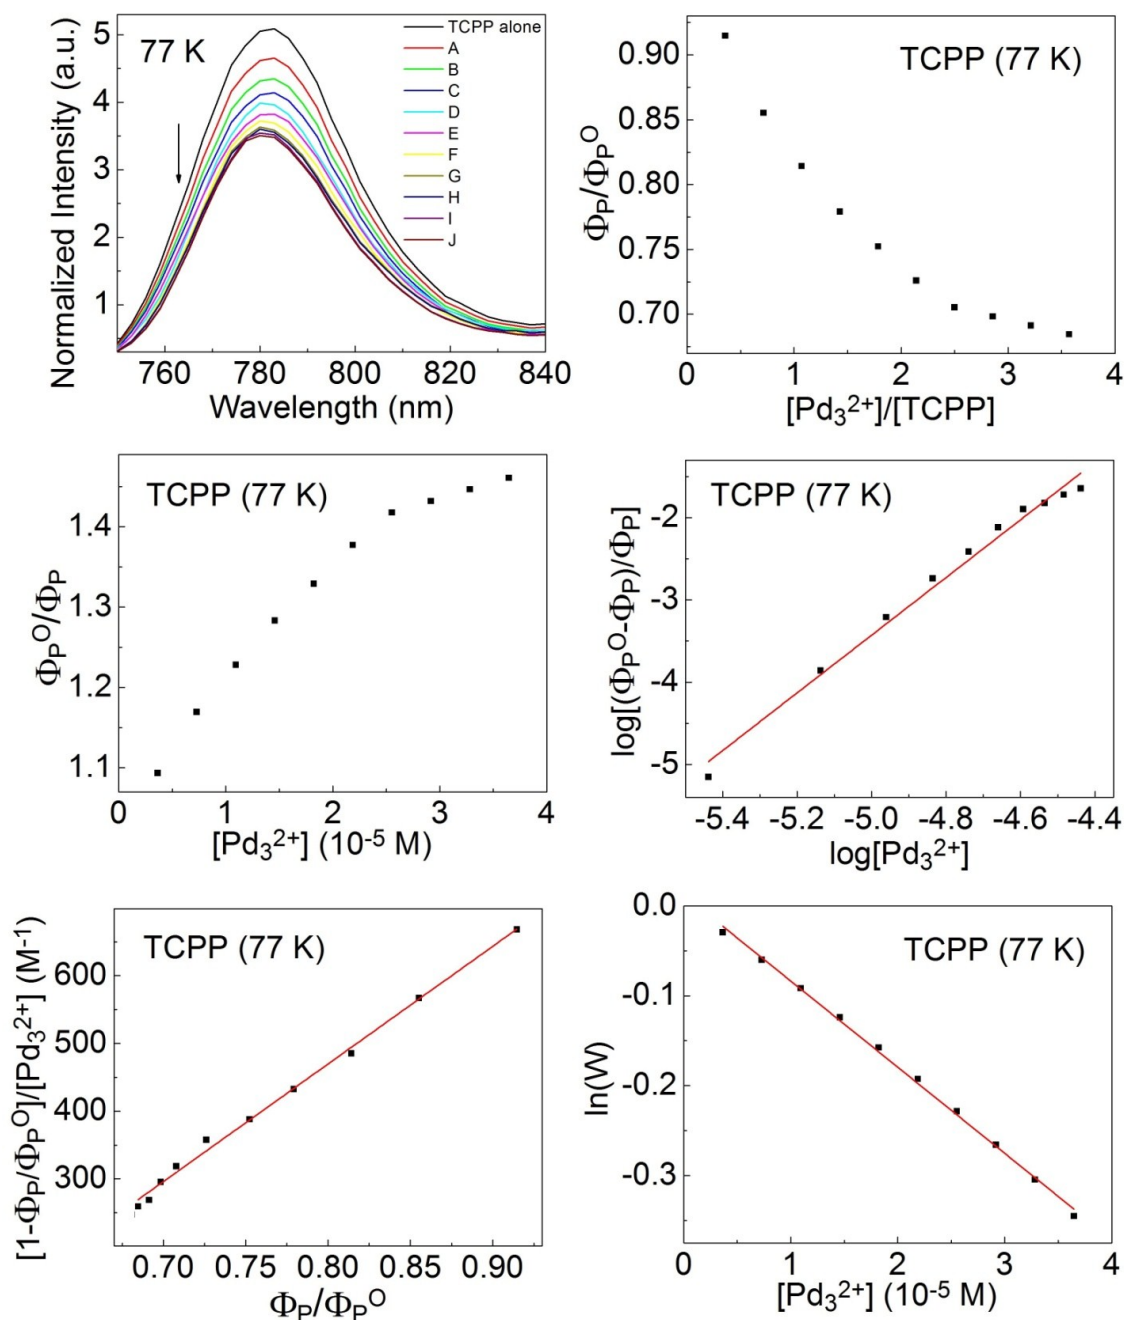

**Figure S1.** Top left: variation of phosphorescence spectra of TCPP ( $1.02 \times 10^{-5} M$ ) upon adding  $[Pd_3^{2+}]$  in 1:1 MeOH:2MeTHF at 77 K. Curves A-J were obtained with successive addition of  $[Pd_3^{2+}]$ . Each curve represents an increase in  $[Pd_3^{2+}]$  concentration by  $3.65 \times 10^{-6}$  for TCPP. Top right: relative decrease of intensity with respect to the starting intensity. Middle left: plot of  $(\Phi_P^0/\Phi_P)$  vs  $[Pd_3^{2+}]$  (i.e. Stern-Volmer plot). Middle right: graph of  $\log[(\Phi_P^0 - \Phi_P)/\Phi_P]$  vs  $\log[Pd_3^{2+}]$ . Bottom left: graph of  $[1 - (\Phi_P/\Phi_P^0)]/[Pd_3^{2+}]$  vs  $(\Phi_P/\Phi_P^0)$ . Bottom right: graph of  $\ln(W)$  vs  $[Pd_3^{2+}]$  for TCPP $\cdots[Pd_3^{2+}]_x$  assembly in 1:1 MeOH:2MeTHF at 77 K.

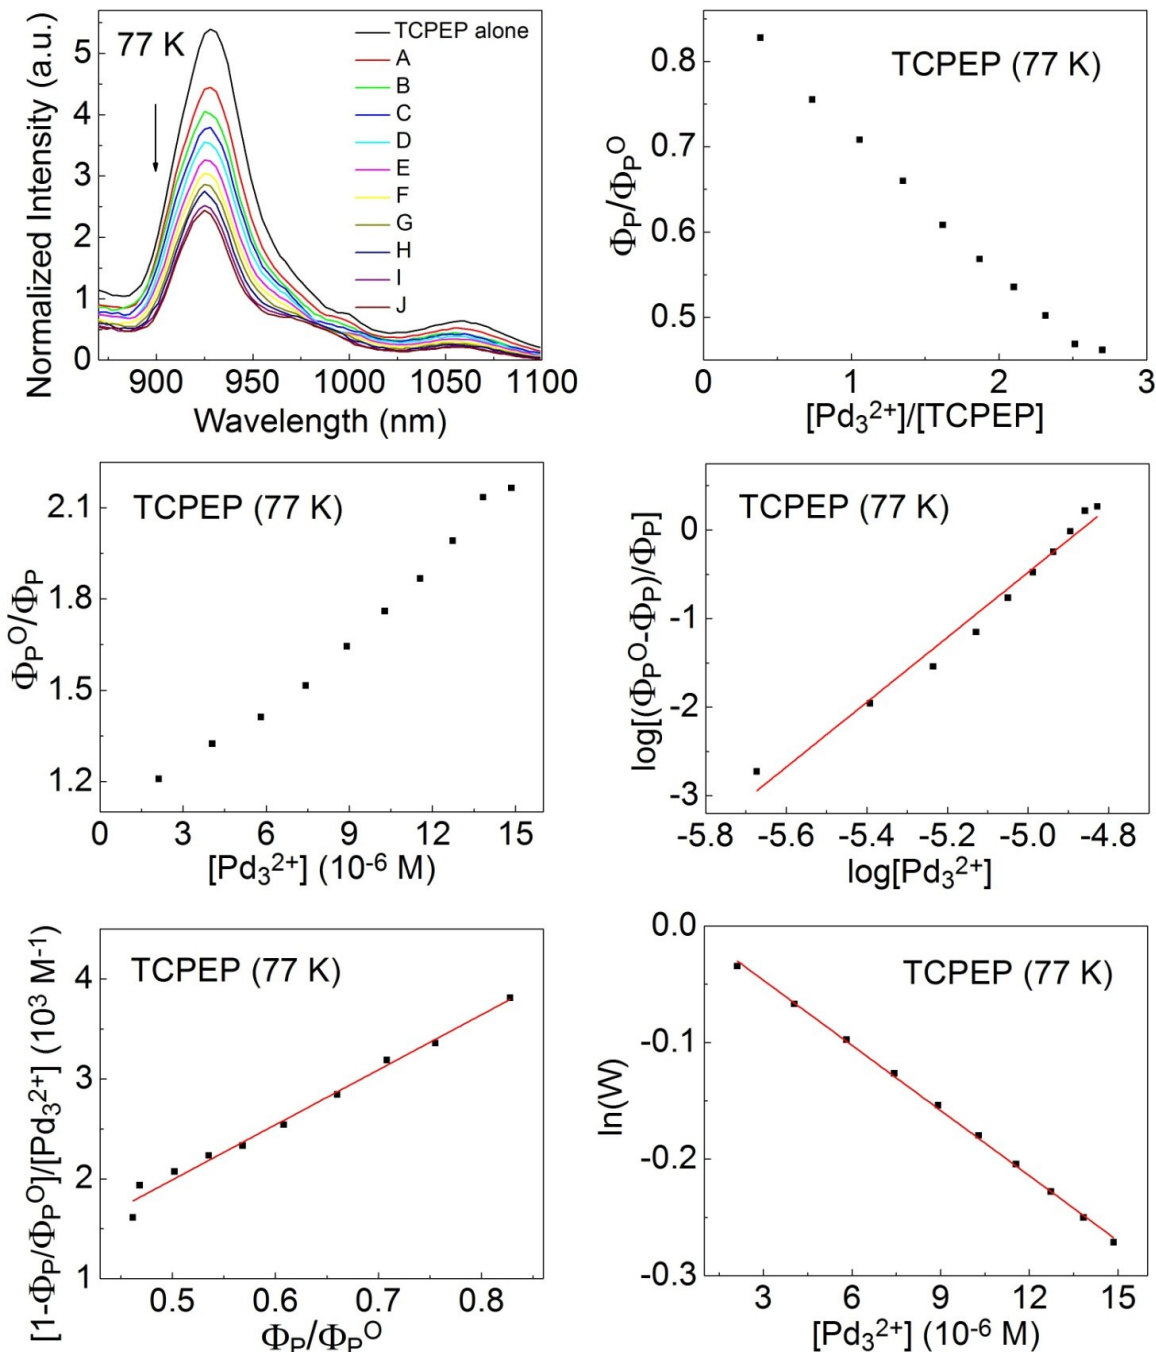

**Figure S2.** Top left: variation of phosphorescence spectra of **TCPEP** ( $5.50 \times 10^{-6}$  M) upon adding  $[Pd_3^{2+}]$  in 1:1 MeOH:2MeTHF at 77 K. Curves A-J were obtained with successive addition of  $[Pd_3^{2+}]$ . Each curve represents an increase in  $[Pd_3^{2+}]$  concentration by  $2.11 \times 10^{-6}$  for **TCPEP**. Top right: relative decrease of intensity with respect to the starting intensity. Middle left: plot of  $(\Phi_{P^0}/\Phi_P)$  vs  $[Pd_3^{2+}]$  (*i.e.* Stern-Volmer plot). Middle right: graph of  $\log[(\Phi_{P^0} - \Phi_P)/\Phi_P]$  vs  $\log[Pd_3^{2+}]$ . Bottom left: graph of  $[1 - (\Phi_P/\Phi_{P^0})]/[Pd_3^{2+}]$  vs  $(\Phi_P/\Phi_{P^0})$ . Bottom right: graph of  $\ln(W)$  vs  $[Pd_3^{2+}]$  for **TCPEP**••• $[Pd_3^{2+}]_x$  assembly in 1:1 MeOH:2MeTHF at 77 K.

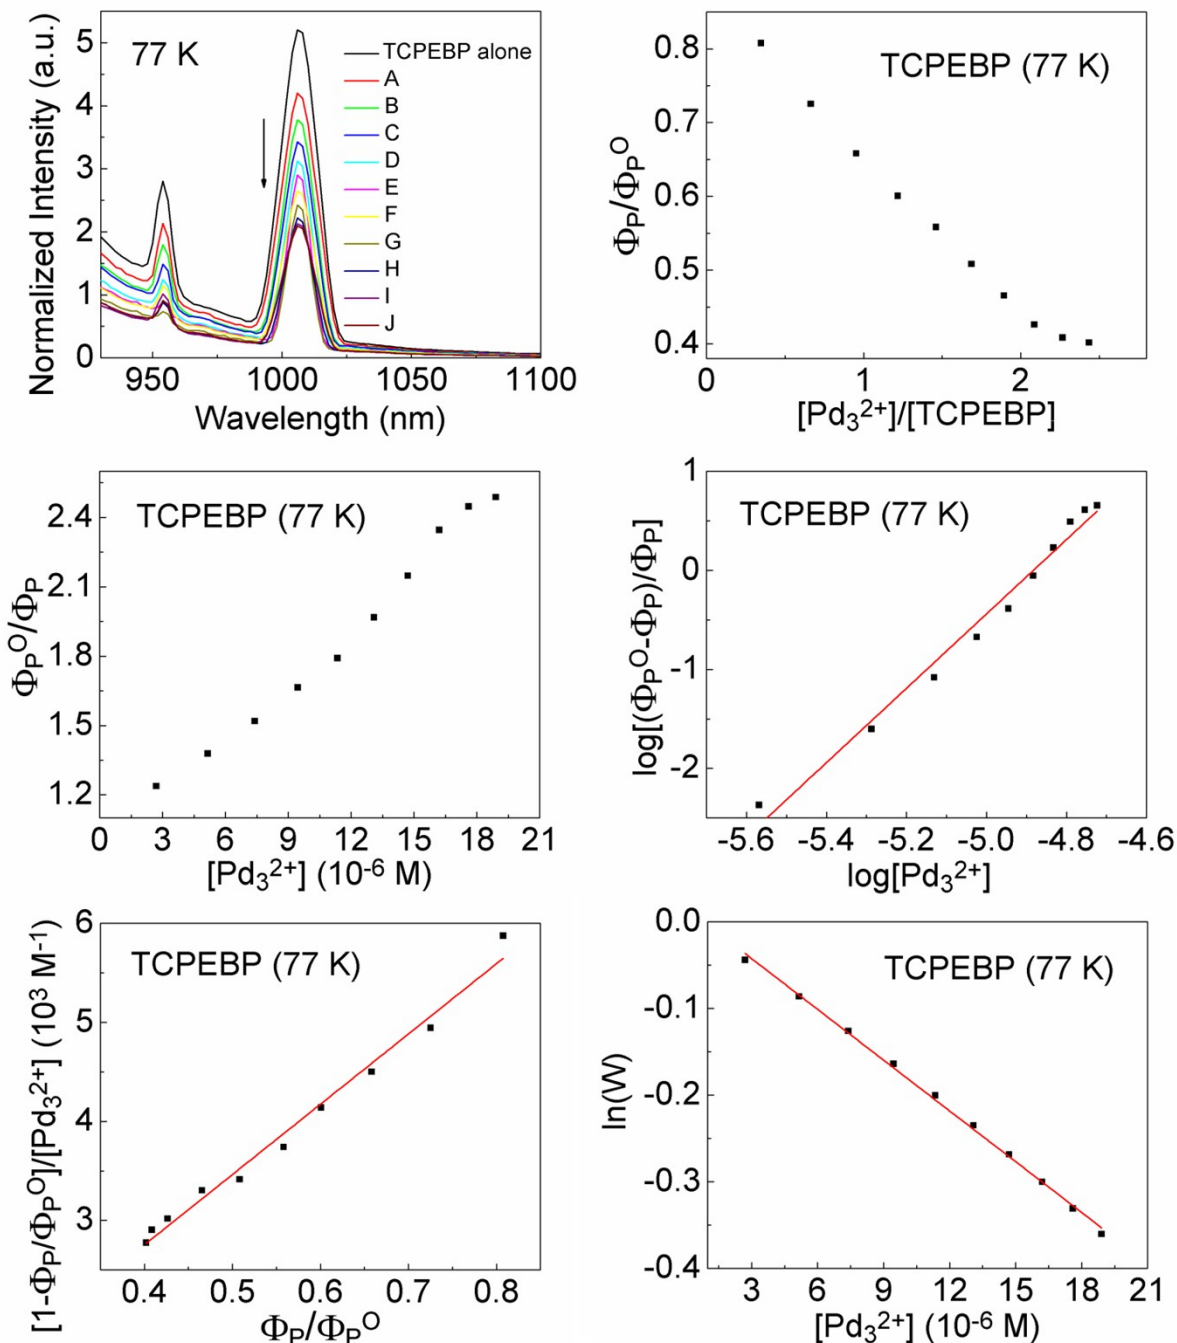

**Figure S3.** Top left: variation of phosphorescence spectra of **TCPEBP** ( $7.78 \times 10^{-6}$  M) upon adding  $[Pd_3^{2+}]$  in 1:1 MeOH:2MeTHF at 77 K. Note that the phosphorescence peaks do not move upon changing the excitation wavelength. Curves A-J were obtained with successive addition of  $[Pd_3^{2+}]$ . Each curve represents an increase in  $[Pd_3^{2+}]$  concentration by  $5.67 \times 10^{-5}$  for **TCPEBP**. Top right: relative decrease of intensity with respect to the starting intensity. Middle left: plot of  $(\Phi_P^0/\Phi_P)$  vs  $[Pd_3^{2+}]$  (*i.e.* Stern-Volmer plot). Middle right: graph of  $\log[(\Phi_P^0 - \Phi_P)/\Phi_P]$  vs  $\log[Pd_3^{2+}]$ . Bottom left: graph of  $[1 - (\Phi_P/\Phi_P^0)]/[Pd_3^{2+}]$  vs  $(\Phi_P/\Phi_P^0)$ . Bottom right: graph of  $\ln(W)$  vs  $[Pd_3^{2+}]$  for **TCPEBP**••• $[Pd_3^{2+}]_x$  assembly in 1:1 MeOH:2MeTHF at 77 K.

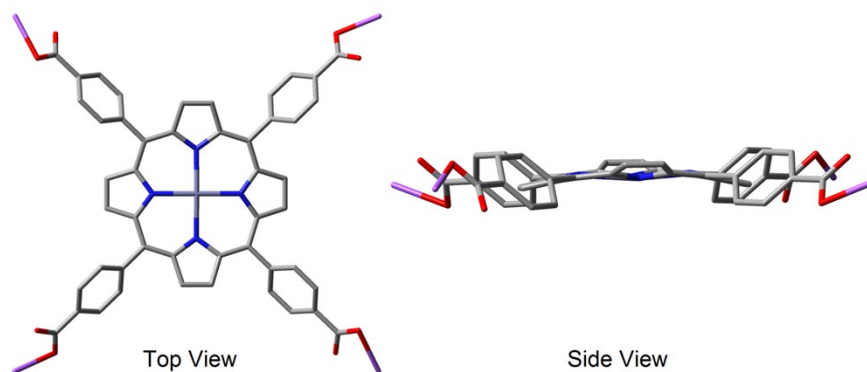

**Figure S4.** Optimized triplet geometry of **TCPP** (as  $\text{Na}^+$  salt) in a MeOH solvent field.

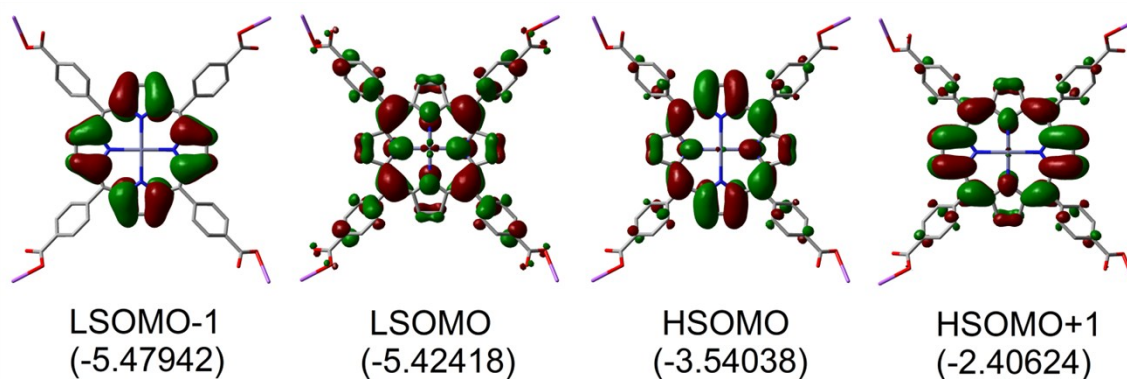

**Figure S5.** Representations of the semi-occupied frontier MOs of **TCPP** ( $\text{Na}^+$  salt) in MeOH solvent field (energies in eV).

**Table S2.** Evaluation of the ( $S_0$ - $T_1$ ) energy gap for **TCPP**.

|             | Singlet $S_0$<br>(a.u.) | Triplet $T_1$<br>(a.u.) | ( $S_0$ - $T_1$ )<br>(a.u.) | ( $S_0$ - $T_1$ )<br>(eV) | Computed position of<br>phosphorescence (nm) |
|-------------|-------------------------|-------------------------|-----------------------------|---------------------------|----------------------------------------------|
| <b>TCPP</b> | -3540.21912             | -3540.16192             | 0.05720                     | 1.55653                   | 797                                          |

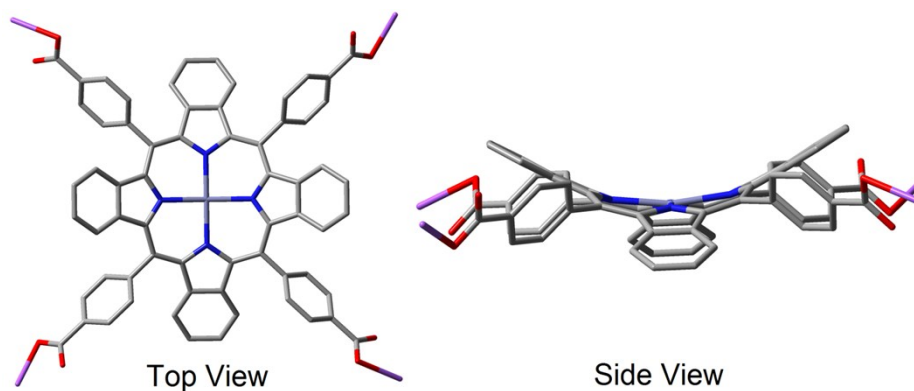

**Figure S6.** Optimized triplet geometry of **TCPBP** ( $\text{Na}^+$  salt) in MeOH solvent field.



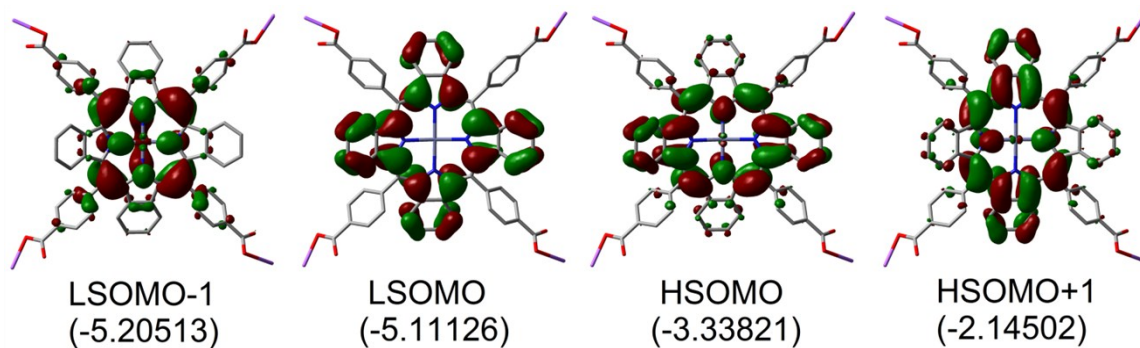

**Figure S7.** Representations of the semi-occupied frontier MOs of **TCPBP** ( $\text{Na}^+$  salt) in MeOH solvent field (energies in eV).

**Table S3.** Evaluation of the ( $S_0$ - $T_1$ ) energy gap for **TCPBP**.

|              | Singlet $S_0$<br>(a.u.) | Triplet $T_1$<br>(a.u.) | ( $S_0$ - $T_1$ )<br>(a.u.) | ( $S_0$ - $T_1$ )<br>(eV) | Computed position of<br>phosphorescence (nm) |
|--------------|-------------------------|-------------------------|-----------------------------|---------------------------|----------------------------------------------|
| <b>TCPBP</b> | -4154.76960             | -4154.71623             | 0.05337                     | 1.45227                   | 855                                          |

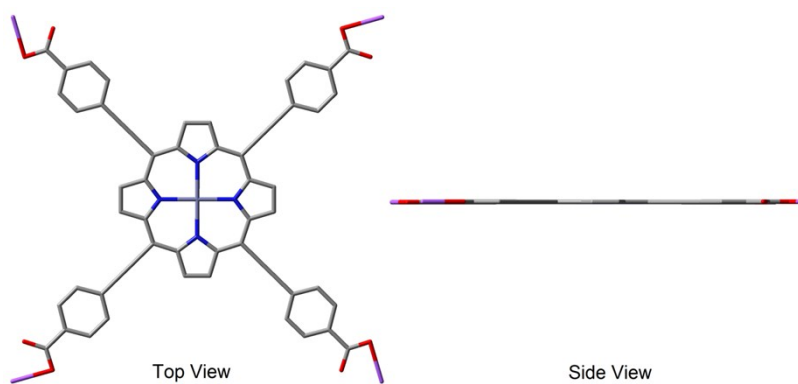

**Figure S8.** Optimized triplet geometry of **TCPEP** ( $\text{Na}^+$  salt) in MeOH solvent field.

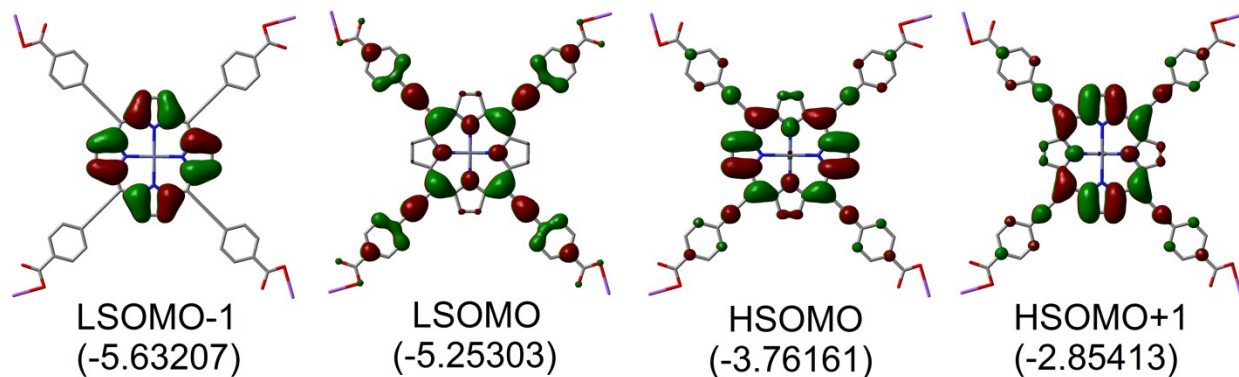

**Figure S9.** Representations of the semi-occupied frontier MOs of **TCPEP** (as  $\text{Na}^+$  salt) in a MeOH solvent field (energies in eV).

**Table S4.** Evaluation of the ( $S_0-T_1$ ) energy gap for **TCPEP** in a MeOH solvent field.

|              | Singlet $S_0$<br>(a.u.) | Triplet $T_1$<br>(a.u.) | ( $S_0-T_1$ )<br>(a.u.) | ( $S_0-T_1$ )<br>(eV) | Computed position of<br>phosphorescence (nm) |
|--------------|-------------------------|-------------------------|-------------------------|-----------------------|----------------------------------------------|
| <b>TCPEP</b> | -3844.86559             | -3844.81791             | 0.04768                 | 1.29750               | 957                                          |

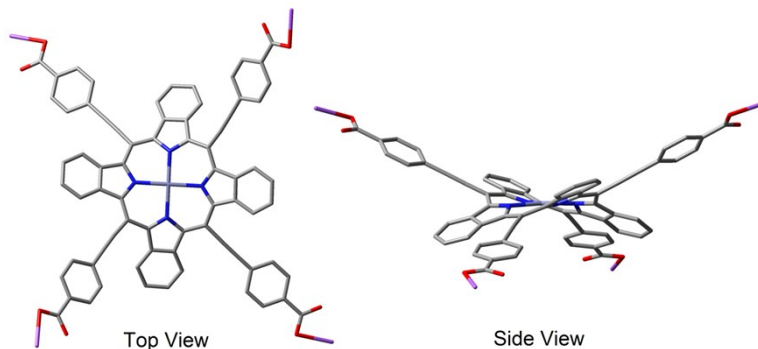

**Figure S10.** Optimized triplet geometry of **TCPEBP** (as  $\text{Na}^+$  salt) in a MeOH solvent field.

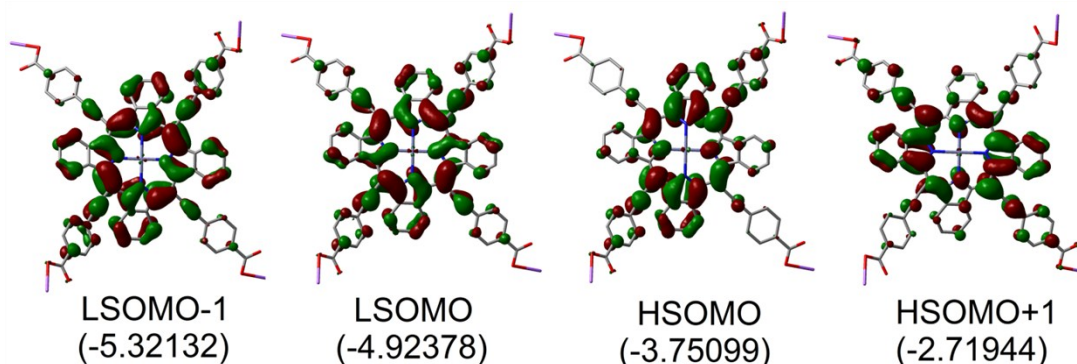

**Figure S11.** Representations of the semi-occupied frontier MOs of **TCPEBP** (as  $\text{Na}^+$  salt) in a MeOH solvent field (energies in eV).

**Table S5.** Evaluation of the ( $S_0-T_1$ ) energy gap for **TCPEBP**.

|               | Singlet $S_0$<br>(a.u.) | Triplet $T_1$<br>(a.u.) | ( $S_0-T_1$ )<br>(a.u.) | ( $S_0-T_1$ )<br>(eV) | Computed position of<br>phosphorescence (nm) |
|---------------|-------------------------|-------------------------|-------------------------|-----------------------|----------------------------------------------|
| <b>TCPEBP</b> | -4459.41685             | -4459.37301             | 0.04384                 | 1.19282               | 1041                                         |

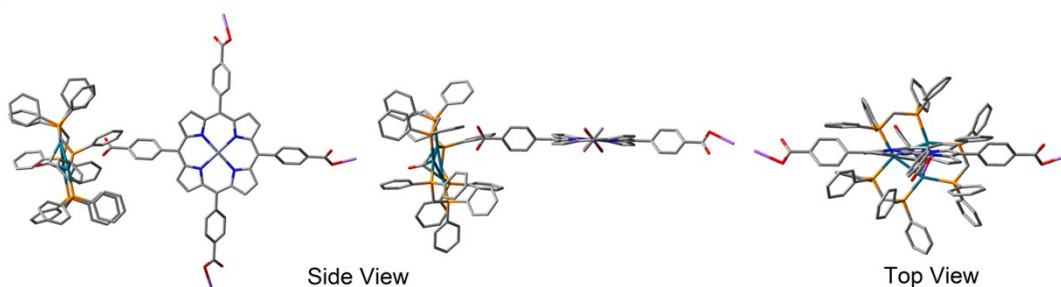

**Figure S12.** Optimized triplet geometry of the **TCPP•••[Pd<sub>3</sub><sup>2+</sup>]** assembly in a MeOH solvent field.



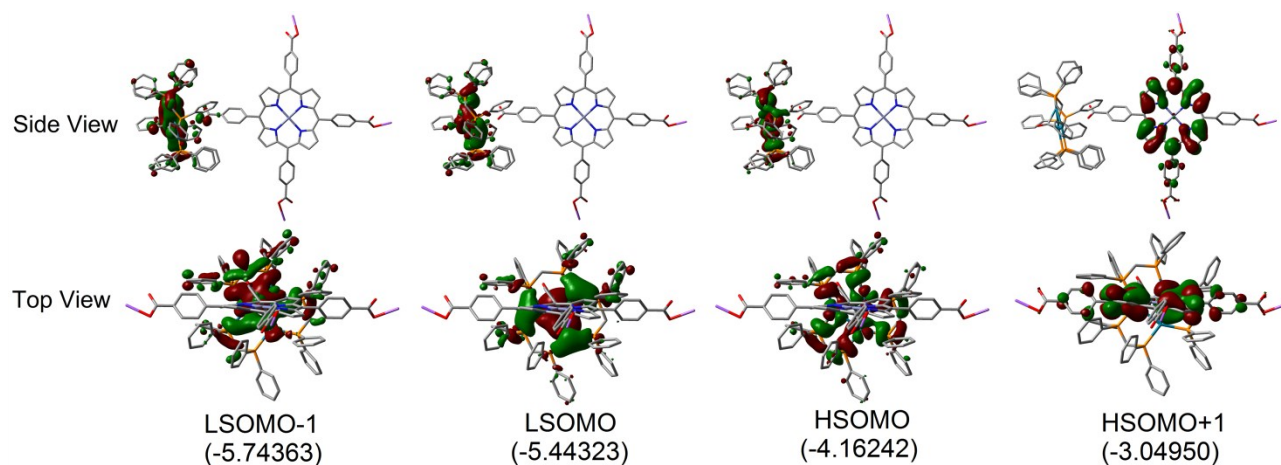

**Figure S13.** Representations of the semi-occupied frontier MOs of the **TCPP•••[Pd<sub>3</sub><sup>2+</sup>]** assembly in MeOH solvent field (energies in eV).

**Table S6.** Comparison of selected calculated distances in the **TCPP•••[Pd<sub>3</sub><sup>2+</sup>]** assembly.

|         | Singlet S <sub>0</sub> (Å) <sup>a</sup>                                                                  | Triplet T <sub>1</sub> (Å)                                                                               |
|---------|----------------------------------------------------------------------------------------------------------|----------------------------------------------------------------------------------------------------------|
| Pd-Pd   | 2.706, 2.696, 2.690 (av.=2.697)                                                                          | 2.829, 2.819, 2.802 (av.=2.817)                                                                          |
| Pd-P    | 2.415, 2.408, 2.405, 2.401, 2.398, 2.394 (av.=2.404)                                                     | 2.446, 2.430, 2.428, 2.426, 2.425, 2.422 (av.=2.430)                                                     |
| Pd•••O  | 1 <sup>st</sup> O: 3.861, 3.754, 3.608 (av.=3.741)<br>2 <sup>nd</sup> O: 5.605, 4.447, 4.444 (av.=4.832) | 1 <sup>st</sup> O: 4.002, 3.711, 3.031 (av.=3.581)<br>2 <sup>nd</sup> O: 5.842, 4.747, 3.711 (av.=4.767) |
| Pd•••Zn | 13.580, 13.339, 13.326 (av.=13.415)                                                                      | 13.472, 13.361, 13.165 (av.=13.333)                                                                      |

<sup>a</sup>From reference 22b of the text.

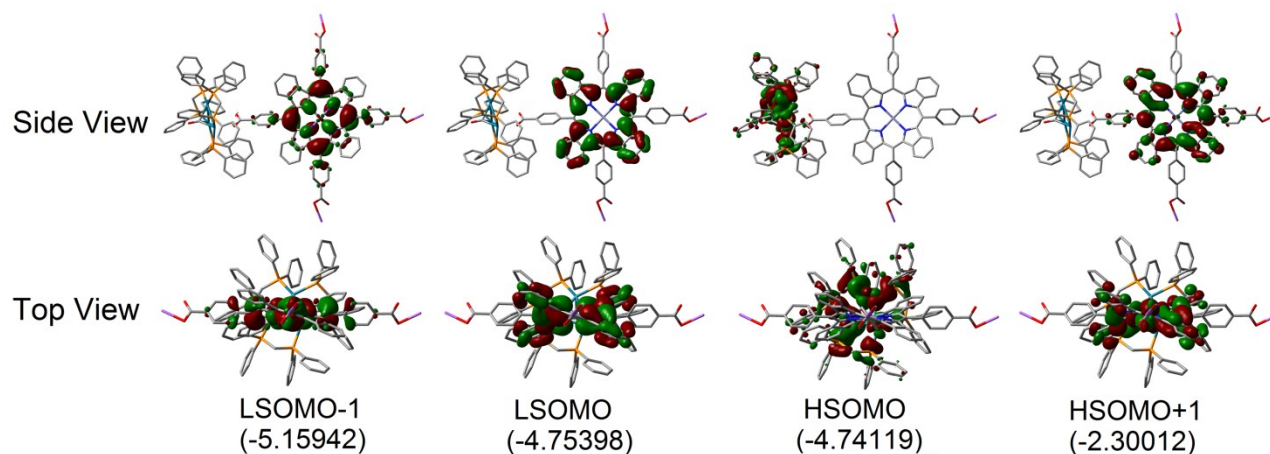

**Figure S14.** Representations of the semi-occupied frontier MOs of the **TCPBP•••[Pd<sub>3</sub><sup>2+</sup>]** assembly in MeOH solvent field (energies in eV).

**Table S7.** Comparison of selected calculated distances in the **TCPBP•••[Pd<sub>3</sub><sup>2+</sup>]** assembly.

|         | Singlet S <sub>0</sub> (Å) <sup>a</sup>                                                                  | Triplet T <sub>1</sub> (Å)                                                                               |
|---------|----------------------------------------------------------------------------------------------------------|----------------------------------------------------------------------------------------------------------|
| Pd-Pd   | 2.702, 2.691, 2.675 (av.=2.689)                                                                          | 2.934, 2.885, 2.795 (av.=2.871)                                                                          |
| Pd-P    | 2.449, 2.438, 2.403, 2.397, 2.392, 2.389<br>(av.=2.411)                                                  | 2.501, 2.469, 2.459, 2.456, 2.413, 2.399<br>(av.=2.450)                                                  |
| Pd•••O  | 1 <sup>st</sup> O: 3.645, 3.631, 3.485 (av.=3.587)<br>2 <sup>nd</sup> O: 4.055, 3.745, 3.443 (av.=3.748) | 1 <sup>st</sup> O: 3.648, 3.545, 3.204 (av.=3.466)<br>2 <sup>nd</sup> O: 4.209, 3.401, 3.303 (av.=3.638) |
| Pd•••Zn | 13.340, 13.025, 12.354 (av.=12.906)                                                                      | 13.195, 13.083, 12.209 (av.=12.829)                                                                      |

<sup>a</sup>From reference 22b.of the text.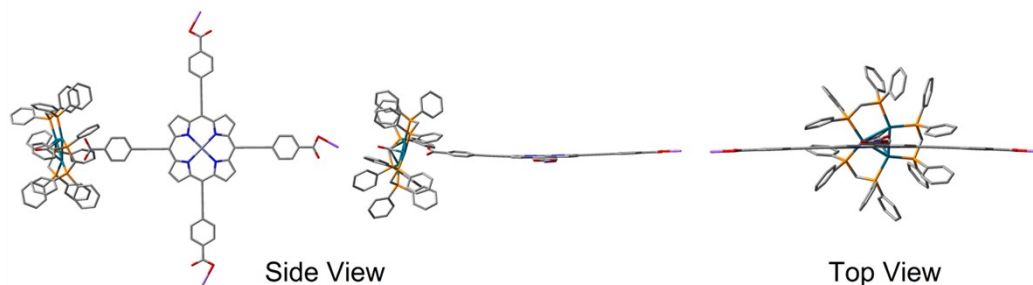**Figure S15.** Optimized triplet geometry of the **TCPEP•••[Pd<sub>3</sub><sup>2+</sup>]** assembly in MeOH solvent field.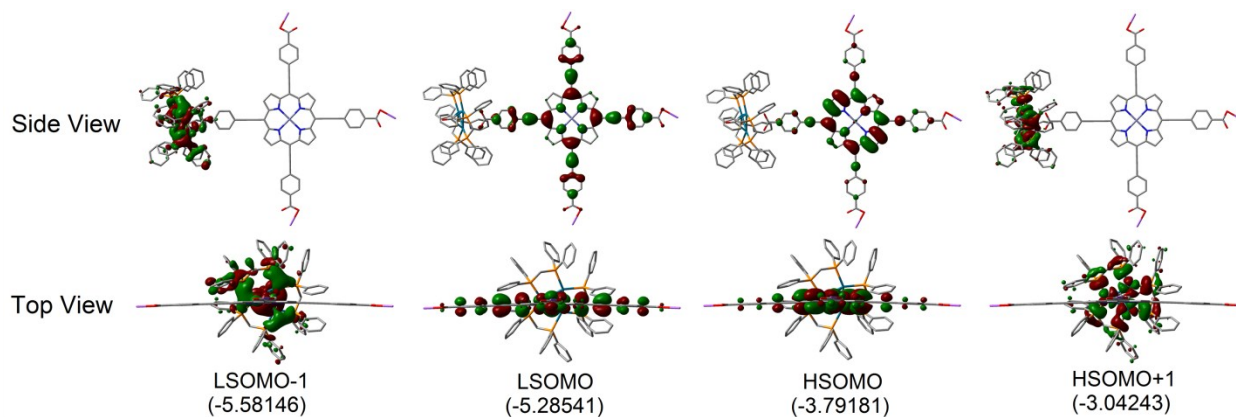**Figure S16.** Representations of the semi-occupied frontier MOs of the **TCPEP•••[Pd<sub>3</sub><sup>2+</sup>]** assembly in MeOH solvent field (energies in eV).**Table S8.** Comparison of selected calculated distances in the **TCPEP•••[Pd<sub>3</sub><sup>2+</sup>]** assembly.

|         | Singlet S <sub>0</sub> (Å) <sup>a</sup>                                                                  | Triplet T <sub>1</sub> (Å)                                                                               |
|---------|----------------------------------------------------------------------------------------------------------|----------------------------------------------------------------------------------------------------------|
| Pd-Pd   | 2.682, 2.675, 2.670 (av.=2.676)                                                                          | 2.829, 2.819, 2.802 (av.=2.817)                                                                          |
| Pd-P    | 2.443, 2.413, 2.409, 2.408, 2.399, 2.380<br>(av.=2.409)                                                  | 2.446, 2.430, 2.428, 2.426, 2.425, 2.422<br>(av.=2.430)                                                  |
| Pd•••O  | 1 <sup>st</sup> O: 3.617, 3.438, 3.079 (av.=3.378)<br>2 <sup>nd</sup> O: 3.868, 3.573, 3.056 (av.=3.499) | 1 <sup>st</sup> O: 3.602, 3.211, 3.031 (av.=3.281)<br>2 <sup>nd</sup> O: 3.642, 3.447, 3.011 (av.=3.367) |
| Pd•••Zn | 15,582, 14,998, 14,956 (av.=15.179)                                                                      | 15,478, 14,893, 14,855 (av.=15.075)                                                                      |

<sup>a</sup>From reference 22c of the text.

**Table S9.** Comparison of selected calculated distances in the **TCPEBP•••[Pd<sub>3</sub><sup>2+</sup>]** assembly.

|         | Singlet S <sub>0</sub> (Å) <sup>a</sup>                                                                  | Triplet T <sub>1</sub> (Å)                                                                               |
|---------|----------------------------------------------------------------------------------------------------------|----------------------------------------------------------------------------------------------------------|
| Pd-Pd   | 2.707, 2.695, 2.678 (av.=2.693)                                                                          | 2.841, 2.807, 2.804 (av.=2.817)                                                                          |
| Pd-P    | 2.433, 2.411, 2.407, 2.396, 2.395, 2.392 (av.=2.406)                                                     | 2.453, 2.439, 2.431, 2.431, 2.429, 2.417 (av.=2.433)                                                     |
| Pd•••O  | 1 <sup>st</sup> O: 3.543, 3.213, 2.896 (av.=3.217)<br>2 <sup>nd</sup> O: 3.696, 3.184, 3.023 (av.=3.301) | 1 <sup>st</sup> O: 3.296, 3.153, 3.041 (av.=3.163)<br>2 <sup>nd</sup> O: 3.530, 3.372, 2.803 (av.=3.235) |
| Pd•••Zn | 15.181, 14.887, 14.642 (av.=14.903)                                                                      | 15.508, 14.417, 14.008 (av.=14.644)                                                                      |

<sup>a</sup>From reference 22c of the text.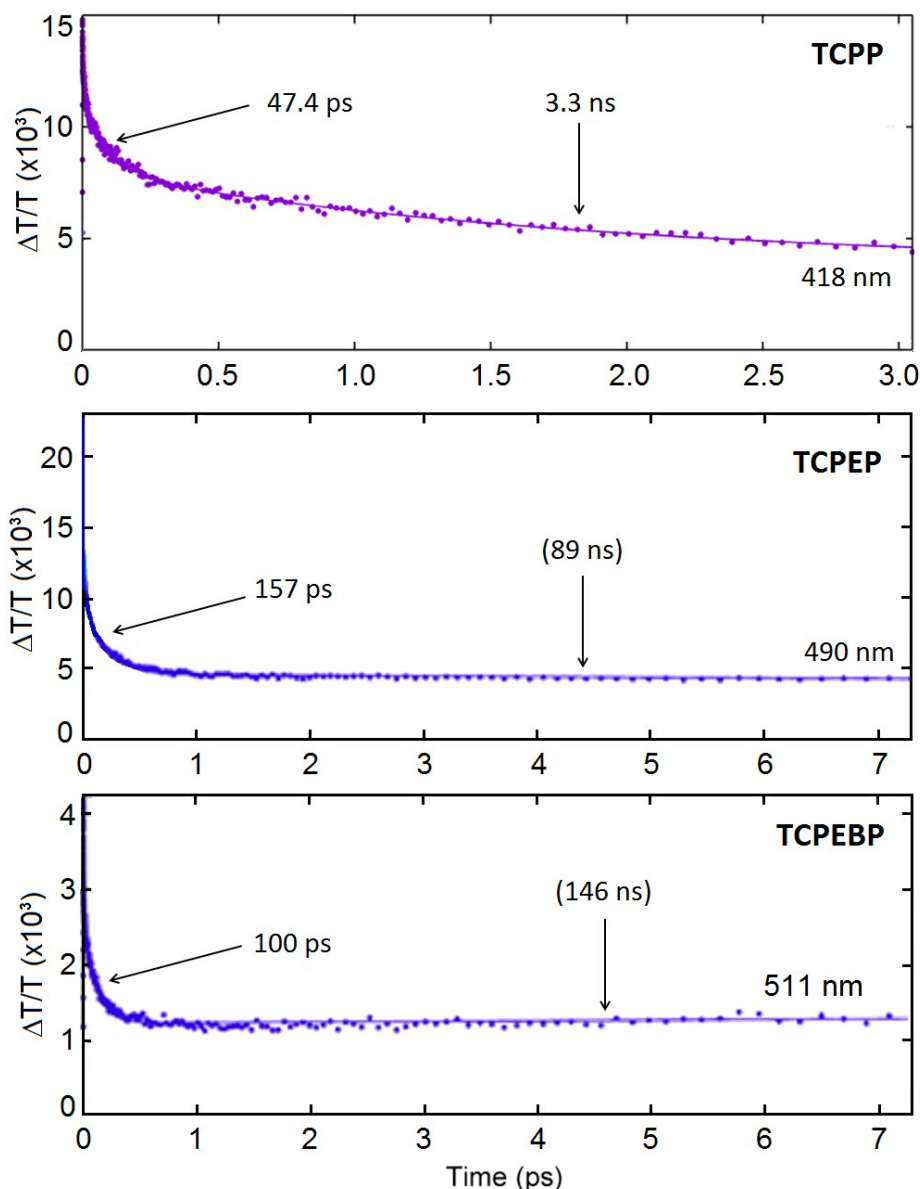**Figure S17.** Monitoring of the transient signals of **TCPP**, **TCPEP** and **PCPEBP** in 2MeTHF in the presence of 2 equiv. of **[Pd<sub>3</sub><sup>2+</sup>]** at 298 K. The monitoring wavelengths are indicated on the graphs. The ps and ns time constants are associated with the charge separation and charge recombination, respectively.
